# Supplementary material
Source: PubMed Central journal article supplement (PMC3225669)
Supplement: tjp0589-5125-SD1.pdf [file tjp0589-5125-SD1.pdf]

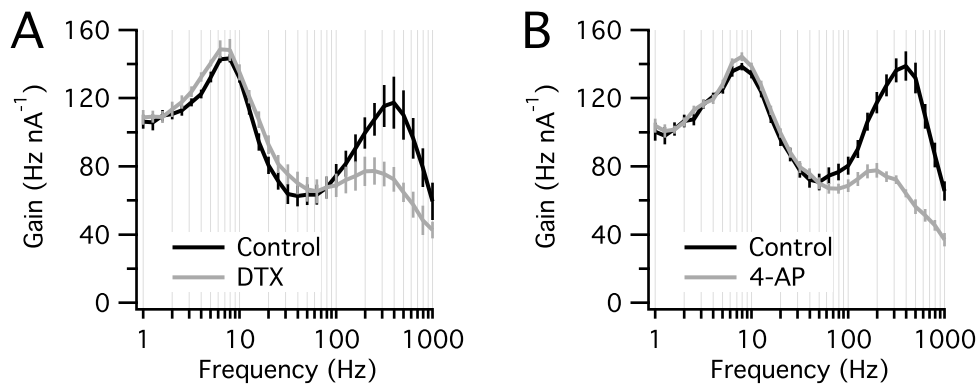

**Supplemental Figure: Effects of Kv1 blockade on the frequency-dependent gain.** The gain was computed based on the responses to noise current (SD = 0.1 nA) in experiments where a target firing rate of 5 Hz was maintained by adjusting the DC offset. The analysis was performed as described previously (Higgs and Spain, 2009). **A.** Gain versus frequency in control solution and in the presence of DTX ( $n = 4$ ). **B.** Gain versus frequency in control solution and during application of 4-AP ( $n = 9$ ). With either DTX or 4-AP, the major effect was a large reduction of the high-frequency peak.
